# Supplementary material
Source: publisher figshare collection journal article supplement (https://frontiersin.figshare.com/ndownloader/files/21257685)
Supplement: Supplementary file 1 [file 21257685]

## Sheet: Data sheet
id	gender	age	stage	baseline	month	F_feces	F_serum	B_feces	b_serum	ald_feces	ald_serum	glucose	bun	creatinine	totalbilirubin	cholesterol	triglyceride	totalprotein	albumin	globulin	alp	alt	ast	ggt	creatinekinase	ld	ca	p	fe	na	k	cl	co2	rbcs	hg	hct	mcv	mch	mchc	platelet	mpv	rdw	twbc	tNeut	tLymph	tMonos	tEosins	tBaso
1	0	50	PreTest	baseline	6	NA	24.98	NA	8.16	NA	167.9	115	44.8	2.7	0.1	297	107	6.8	3.7	3.1	90	9	37	21	56	311	8.5	6.3	81	149	4	114	28	3.76	14.9	42.2	112.3	39.7	35.3	136	13.3	11.6	2880	2188.8	460.8	201.6	28.8	0
1	0	50	Recovery	Recovery	6	119.55	14.49	39.36	4.64	19.92	85.47	121	44.3	2.4	0.1	285	158	6.5	3.6	2.9	90	9	36	19	51	292	8.3	5.8	74	147	3.8	114	28	3.95	15.4	44.9	113.5	38.9	34.3	145	13.7	11.7	4010	3087.7	441.1	240.6	120.3	0
1	0	50	Recovery	Recovery	6	184.25	10.73	86.29	3.35	53.7	63.6	124	46.2	2.4	0.1	290	112	6.6	3.7	2.9	92	9	38	22	54	306	8.4	6.1	71	150	3.8	114	27	3.96	15.5	44.6	112.5	39.2	34.8	144	13.4	11.7	3340	2772.2	434.2	66.8	33.4	0
1	0	50	Post_Test	baseline	6	278.88	16.83	180.43	5.54	50.88	54.08	125	44.5	2.7	0.2	299	104	6.4	3.7	2.7	91	10	36	20	52	290	8.4	5.5	72	150	3.7	115	29	3.9	15.4	43.9	112.5	39.5	35.1	142	14	11.7	4120	2966.4	741.6	206	41.2	0
1	0	50	Recovery	Recovery	6	NA	15.58	NA	3.61	NA	45.72	128	47.7	2.5	0.1	287	149	6.7	3.7	3	98	8	38	20	57	311	8.4	6.1	76	151	3.9	115	28	3.83	15.2	43.5	113.4	39.8	35	133	12.9	11.7	3010	2709	90.3	90.3	30.1	0
1	0	50	Stress_Test	Stress	6	NA	53.73	NA	18.56	NA	156.09	132	45.4	2.7	0.2	301	118	7	3.8	3.2	98	9	39	21	59	315	8.8	6.3	76	151	3.9	115	28	3.77	14.9	42.4	112.7	39.4	35	138	13.6	11.7	3230	2519.4	355.3	129.2	32.3	0
1	0	50	Post_Test	baseline	6	126.36	11.15	42.11	4.1	7.53	210.49	NA	NA	NA	NA	NA	NA	NA	NA	NA	NA	NA	NA	NA	NA	NA	NA	NA	NA	NA	NA	NA	NA	NA	NA	NA	NA	NA	NA	NA	NA	NA	NA	NA	NA	NA	NA	NA
1	0	50	Post_Test	baseline	6	361.63	NA	155.98	NA	37.46	NA	NA	NA	NA	NA	NA	NA	NA	NA	NA	NA	NA	NA	NA	NA	NA	NA	NA	NA	NA	NA	NA	NA	NA	NA	NA	NA	NA	NA	NA	NA	NA	NA	NA	NA	NA	NA	NA
3	0	26	PreTest	baseline	3	55.9	22.17	13.74	7.05	2.96	20.46	97	38	2	0.1	328	191	7.2	3.6	3.6	144	14	38	5	74	346	8.3	5.7	62	146	4	123	29	3.76	14.9	44.1	117	39.7	33.9	126	14.3	12.6	6610	5354.1	528.8	330.5	330.5	0
3	0	26	Post_Test	baseline	4	84.56	18.17	21.06	3.82	14.28	19.45	100	39	2.1	0.2	326	156	7.2	3.6	3.6	140	16	39	5	78	369	8.5	6	75	147	4	124	30	3.7	14.5	43.3	117	39.3	33.6	149	15.1	13	5190	4152	674.7	311.4	51.9	0
3	0	26	Recovery	Recovery	3	148.8	11.15	41.03	2.04	9.62	8.45	109	43	2	0.1	314	245	7.2	3.7	3.5	149	14	39	5	75	357	8.2	6.2	65	146	4.1	122	32	3.68	14.9	43.2	117	40.4	34.4	129	12.7	13.6	4650	3859.5	465	186	93	0
3	0	26	Recovery	Recovery	3	195.89	10	93.85	1.28	13.48	6.94	118	42	2	0.1	312	185	7.1	3.6	3.5	146	15	38	5	71	349	8	5.8	66	146	3.9	124	28	3.74	14.9	43.5	116	39.9	34.3	134	14	13.1	5770	4904.5	461.6	288.5	57.7	0
3	0	26	Stress_Test	Stress	3	NA	122.77	NA	32.74	NA	88.57	158	38	2.5	0.2	324	170	7.3	3.7	3.6	145	15	45	5	77	378	8.4	5.6	66	145	3.8	123	26	3.94	15.6	45.8	116	39.6	34.1	137	15.4	12.5	7100	5680	994	213	213	0
4	0	8	Recovery	Recovery	4	119.67	7.41	50.98	1.5	25.44	20	100	46	1.1	0.1	163	138	5.8	2.8	3	409	18	41	16	116	390	7.8	5.8	56	115	3	93	29	4.2	14.8	45.1	107	35.2	32.7	165	16.2	13.7	4440	3241.2	888	222	88.8	0
4	0	8	PreTest	baseline	4	173.22	7.93	98.38	3.4	38.44	16.52	120	48	1.4	0.1	229	131	6.7	3.4	3.3	468	17	49	19	124	471	8.7	6.6	57	152	3.9	119	28	4.15	14.4	44.6	107	34.8	32.4	156	19.6	12.7	4190	2974.9	796.1	419	0	0
4	0	8	Post_Test	baseline	4	NA	10.28	NA	3.55	NA	16.68	122	47	1.3	0.1	200	129	6.6	3.2	3.4	474	18	45	19	125	447	8.3	6.1	51	140	3.5	116	32	4.14	14.05	44.6	108	34.9	32.4	156	17.4	13.1	5120	3737.6	870.4	460.8	0	0
4	0	8	Recovery	Recovery	4	NA	6.46	NA	1.56	NA	17.66	127	53	1.2	0.1	221	177	6.8	3.5	3.3	514	21	52	20	130	494	8.4	6.7	59	148	3.8	118	35	4.21	14.9	45.3	108	35.3	32.8	178	14.5	13.5	4760	3808	571.2	285.6	47.6	0
4	0	8	Stress_Test	Stress	4	NA	28.9	NA	12.59	NA	57.55	160	47	1.6	0.1	221	146	6.8	3.3	3.5	493	19	56	20	132	493	8.3	7.4	61	149	3.8	124	29	4.17	14.5	44.9	109	34.7	32.2	159	16.7	13.8	5420	3577.2	1355	325.2	162.6	0
5	0	9	Recovery	Recovery	4	124.86	8.39	68.96	1.89	8.95	77.87	120	44	1	0.1	169	228	6.4	3.4	3	507	25	42	8	115	396	8.2	5.7	82	133	3.4	108	32	3.82	15.2	43.8	115	39.6	34.6	178	14.8	13.8	4980	3535.8	996	398.4	49.8	0
5	0	9	Recovery	Recovery	4	NA	9.44	NA	2.02	NA	27.22	121	42	1.1	0.1	173	172	6.6	3.5	3.1	528	27	47	8	124	427	8.2	5.9	90	141	3.7	114	37	3.75	14.9	43.3	115	39.3	34.3	170	14	14.5	4670	3362.4	980.7	186.8	93.4	0
5	0	9	Post_Test	baseline	4	82.93	10.16	17.78	3.51	10.9	17.29	128	39	1.2	0.1	158	148	6.4	3.3	3.1	488	23	38	8	113	363	8.4	5.2	56	126	3.1	106	34	3.88	15	44.4	114	38.6	33	166	13.2	12.8	4490	3457.3	628.6	269.4	134.7	0
5	0	9	PreTest	baseline	4	124.51	9.26	39.68	4.1	16.09	36.55	137	40	1.3	0.1	188	138	6.7	3.6	3.1	518	27	48	9	115	428	8.5	5.9	69	147	3.8	124	33	3.88	15.1	44.5	115	38.9	33.9	172	15	13	3840	2918.4	614.4	192	115.2	0
5	0	9	Stress_Test	Stress	4	108.75	69.87	33.03	25.47	10.51	145.84	159	39	1.2	0.1	165	136	6.6	3.4	3.2	495	26	40	8	115	392	8	5.5	68	131	3.4	109	32	3.94	15.3	45.2	115	38.7	33.8	163	15.5	13.9	6500	5200	715	260	260	0
6	0	5	Recovery	Recovery	3	NA	8.15	NA	1.01	NA	6.08	119	38	1.1	0.08	166	193	5.6	3.5	2.1	500	17	48	5	163	335	8.4	6.9	134	153	3.9	116	31	3.92	16	45.8	117	40.8	34.9	128	11.4	12.2	4110	2466	1274.1	205.5	164.4	0
6	0	5	Post_Test	baseline	3	NA	12.82	NA	4.03	NA	22.82	122	33	1.3	0.08	172	121	5.7	3.4	2.3	464	14	44	6	173	316	8.4	6.6	97	155	4	121	30	3.76	15.4	43.5	116	40.9	35.3	121	11.7	11.5	4360	3095.6	828.4	174.4	261.6	0
6	0	5	PreTest	baseline	3	NA	10.92	NA	2.32	NA	7.74	127	33	1.2	0.06	163	140	5.8	3.3	2.5	453	14	46	6	162	316	8.4	6.4	95	154	3.9	118	31	3.72	15.2	43.3	117	40.8	35	124	14.2	11.4	3690	2398.5	922.5	221.4	147.6	0
6	0	5	Recovery	Recovery	3	59.96	6.35	31.63	1.55	6.04	20.32	128	39	1.1	0.08	170	175	6	3.4	2.6	487	15	46	6	157	322	8.3	6.8	131	154	3.9	120	31	3.86	15.8	44.1	114	40.9	35.9	141	12.1	12.5	4070	3093.2	732.6	122.1	81.4	0
6	0	5	Stress_Test	Stress	3	190.52	27.62	93.76	6.4	22.39	26.28	168	34	1.3	0.08	168	134	5.9	3.3	2.6	475	17	46	6	158	328	8.4	6	104	153	3.6	118	28	3.69	15.1	42.7	116	40.8	35.3	127	13.5	11.8	3300	1914	1023	198	165	0
7	0	22	PreTest	baseline	6	NA	7.92	NA	2.02	NA	18.39	106	29.4	1.7	0.1	174	121	7.3	3.4	3.9	52	8	34	5	72	296	8.2	5	75	153	3.4	115	32	3.92	15.5	44.2	112.8	39.4	35	118	17.7	10.7	8830	7417.2	1059.6	88.3	88.3	0
7	0	22	Recovery	Recovery	6	NA	8.63	NA	1.21	NA	4.97	115	32	1.7	0.1	166	152	7.1	3.4	3.7	55	9	32	5	68	269	7.8	5.4	67	154	3.7	112	33	3.92	15.3	43.4	110.6	39	35.3	129	18	10.6	8000	6240	1360	320	0	0
7	0	22	Recovery	Recovery	6	NA	9.22	NA	0.82	NA	4.97	116	30.3	1.6	0.1	169	166	7.3	3.4	3.9	52	8	34	5	69	284	8	5.2	72	152	3.8	114	33	3.87	15.3	43.7	112.9	39.5	35	120	19.6	10.7	7620	6781.8	685.8	76.2	0	0
7	0	22	Recovery	Recovery	6	NA	11.05	NA	1.49	NA	4.97	116	35.6	1.7	0.1	180	175	7.6	3.5	4.1	60	8	34	6	63	299	8.3	5.7	64	152	3.8	114	33	4.04	15.7	45.4	112.3	38.9	34.7	127	18	10.5	8490	7471.2	594.3	169.8	84.9	0
7	0	22	Post_Test	baseline	6	NA	13.94	NA	2.59	NA	10.55	119	32.6	1.7	0.1	172	204	7.4	3.5	3.9	58	5	34	5	65	293	8	5.8	53	151	3.9	112	31	4.04	15.8	45.6	112.9	39.1	34.6	134	19.5	10.6	8310	6648	997.2	415.5	83.1	0
7	0	22	Post_Test	baseline	6	140.65	13.41	57.37	2.42	14.2	15.84	121	29.5	1.5	0.1	173	188	7.3	3.5	3.8	57	8	33	6	72	281	7.9	4.7	72	151	3.9	115	30	3.98	15.7	44.2	110.9	39.5	35.6	129	17.2	10.6	7040	5913.6	633.6	211.2	70.4	0
7	0	22	Stress_Test	Stress	6	85.2	NA	39.35	NA	5.27	NA	NA	NA	NA	NA	NA	NA	NA	NA	NA	NA	NA	NA	NA	NA	NA	NA	NA	NA	NA	NA	NA	NA	4.13	15.9	46.4	112.3	38.6	34.4	109	18.9	10.6	8150	7172	733.5	163	0	0
8	0	24	PreTest	baseline	3	327.24	13.55	175.43	4.85	22.46	36.79	104	42	1.7	0.11	155	55	6.7	3.4	3.3	148	18	44	12	122	362	8	5.2	61	155	4.1	123	28	3.56	15	42.7	120	42.1	35.1	101	12.3	13.1	3560	2705.6	676.4	106.8	71.2	0
8	0	24	Recovery	Recovery	3	426.45	12.76	111.4	3.14	20.22	7.28	106	46	1.6	0.09	155	112	7	3.4	3.6	160	19	45	11	121	381	7.9	5.9	84	153	4.1	119	31	3.8	15.6	45.8	120	41	34	107	10.8	13	2870	2353.4	287	114.8	86.1	0
8	0	24	Post_Test	baseline	3	NA	20.54	NA	5.42	NA	26.03	107	42	1.7	0.1	161	62	6.3	3.5	2.8	143	17	46	14	127	385	8	5.1	62	154	4.4	121	30	3.68	15.5	43.9	119	42.1	35.3	111	13.5	12.7	4230	3341.7	592.2	211.5	84.6	0
8	0	24	Post_Test	baseline	3	NA	18.26	NA	5	NA	32.74	120	41	1.8	0.12	151	57	6.1	3.3	2.8	134	18	45	12	125	378	7.9	5	60	154	4.1	123	30	3.59	15.2	43	120	42.3	35.2	101	13.7	12.6	5360	3859.2	1072	375.2	53.6	0
8	0	24	Stress_Test	Stress	3	335.44	50.26	167.09	15.49	19.45	57.76	132	41	1.8	0.08	157	67	6.4	3.4	3	143	19	45	11	122	376	8	5	71	153	3.9	123	28	3.64	15.5	43.5	120	42.5	35.5	108	11.8	12.8	4240	3180	763.2	127.2	127.2	0
10	1	22	Recovery	Recovery	6	210.31	15.33	30.33	3.06	7.2	30.3	104	30.5	2	0.1	196	180	7.2	3.8	3.4	123	28	51	20	113	441	8.5	5.5	97	155	4.2	120	27	3.7	14.9	42.3	114.4	40.4	35.3	101	14.1	11.6	4120	2678	947.6	329.6	82.4	0
10	1	22	Post_Test	baseline	6	NA	10.94	NA	2.86	NA	19.89	111	30.7	2.2	0.1	188	150	3.9	3.6	3.3	119	22	42	17	97	380	8.4	5.6	105	152	4.2	123	24	3.77	15.2	43.1	114.3	40.2	35.2	114	14	11.6	4620	3049.2	1062.6	231	138.6	0
10	1	22	Recovery	Recovery	6	NA	18.2	NA	4.49	NA	64.43	113	31.8	1.8	0.1	187	198	6.8	3.7	3.1	118	27	47	16	100	409	8.2	5.3	92	152	4	120	25	3.71	15.2	42.9	115.4	40.8	35.4	116	13.9	11.4	3910	2541.5	1133.9	78.2	117.3	0
10	1	22	Post_Test	baseline	6	139.46	9.59	27.96	2.06	6.45	7.98	117	31.8	1.7	0.1	184	181	6.7	3.6	3.1	114	22	43	16	89	376	8.1	5.5	93	151	4.1	122	22	3.78	15.2	43.2	114.2	40.1	35.1	123	14	11.4	3810	2857.5	876.3	38.1	0	0
10	1	22	PreTest	baseline	6	NA	12.78	NA	3.37	NA	29.84	117	30.4	2.1	0.1	190	174	6.9	3.7	3.2	115	19	41	17	107	386	8.2	5.7	89	152	4	123	23	3.83	15.4	43.5	113.5	40.2	35.4	121	14.7	11.6	4430	3455.4	575.9	132.9	132.9	0
10	1	22	Stress_Test	Stress	6	NA	39.83	NA	8.95	NA	43.33	117	31.4	2.2	0.1	202	175	7.4	3.8	3.6	127	21	46	19	111	414	8.5	5.8	97	154	4.2	121	25	3.68	14.9	42.6	115.7	40.6	35	124	14.2	11.5	4790	3353	910.1	287.4	143.7	0
10	1	22	Recovery	Recovery	6	94.13	9.39	18.39	1.46	2.61	7.36	130	31.3	2	0.1	187	181	7.1	3.7	3.4	119	27	49	18	105	427	8.3	5.5	94	152	3.9	121	24	3.76	15.2	42.9	114.2	40.5	35.5	113	14.1	11.5	3220	2415	547.4	161	32.2	0
11	1	23	Recovery	Recovery	3	NA	23.23	NA	4.78	NA	47.89	113	44	2	0.07	129	115	8	3.4	4.5	75	16	45	19	42	403	8.3	5.3	42	151	3.9	117	31	4.03	14.2	41.3	103	35.3	34.4	97.8	21.9	13.4	6640	5378.4	730.4	464.8	66.4	0
11	1	23	PreTest	baseline	3	375.89	18.88	101.18	4	39.93	28.62	115	38	2.5	0.11	129	92	7.5	3.6	3.9	80	13	45	20	38	399	8.3	5.2	27	151	4	119	31	4.06	14.4	41.8	103	35.6	34.5	86.3	22.5	14.7	6530	5224	848.9	326.5	130.6	0
11	1	23	Recovery	Recovery	3	251.77	17.65	63.72	3.22	17.13	43.13	117	41	1.9	0.11	129	180	8.1	3.6	4.5	77	15	49	19	42	407	8.4	5	42	150	3.9	118	29	4.06	14.4	41	102	35.5	35	88	23.1	14.2	5200	4212	780	208	0	0
11	1	23	Post_Test	baseline	3	294.72	40.01	102.97	8.49	20.16	54.21	141	31	2	0.11	123	102	7.4	3.5	3.9	75	16	43	20	31	384	8	4.5	15	149	3.9	117	27	3.97	14.2	40.9	103	35.7	34.7	83.9	0	14.8	6730	5720.5	538.4	336.5	134.6	0
11	1	23	Stress_Test	Stress	3	NA	124.37	NA	23.34	NA	94.55	150	37	2.6	0.09	137	92	8.5	3.8	4.7	77	18	46	20	40	418	8.6	4.9	35	150	3.6	118	26	4.09	14.9	41.7	102	36.4	35.6	90.2	27	13.5	7470	5826.6	1195.2	448.2	0	0
12	1	5	Post_Test	baseline	5	71.32	10.23	29.53	1.78	14.94	73.24	109	39	1.1	0.1	143	119	6.2	3.2	3	432	28	55	14	134	458	8.2	6.4	45	151	3.9	126	32	3.57	13.1	39.1	110	36.3	33.5	147	14.9	12.8	4350	3001.5	1000.5	304.5	43.5	0
12	1	5	PreTest	baseline	5	115.26	9.27	29.63	1.69	31.67	112.59	117	42	1	0.1	150	162	6.3	3.3	3	436	28	57	15	126	490	8.1	6.3	46	151	3.7	125	33	NA	NA	NA	NA	NA	NA	NA	NA	NA	NA	NA	NA	NA	NA	NA
12	1	5	PreTest	baseline	5	NA	8.99	NA	1.57	NA	113.9	118	42	1	0.1	152	160	6.4	3.3	3.1	432	29	57	15	129	479	8	6.1	45	151	3.6	124	34	3.8	13.7	41.8	110	36	32.7	138	18	13.1	4560	3055.2	1048.8	228	228	0
12	1	5	Recovery	Recovery	5	40.97	6.39	9.02	1.85	6.62	221.47	125	46	1	0.1	146	150	6.3	3.4	2.9	455	27	55	14	128	463	8	7	51	147	3.9	121	30	3.53	13.1	38.6	109	37.2	34.1	148	13.8	12.6	4210	3073.3	631.5	421	42.1	0
12	1	5	Recovery	Recovery	5	97.9	6.88	28.17	0.9	21.46	38.49	129	44	0.9	0.1	148	158	6.5	3.4	3.1	461	28	55	15	130	470	7.9	6.6	59	148	3.6	119	35	3.73	14.2	41.4	111	38.2	34.4	158	13.1	13.1	4550	3412.5	773.5	273	91	0
12	1	5	Stress_Test	Stress	5	NA	18.9	NA	5.3	NA	169.98	130	144	1	0.1	158	163	6.6	3.5	3.1	451	29	56	16	139	496	8.3	6	47	153	3.7	120	28	3.87	14	42.7	110	36.2	32.9	149	15.7	12.1	5080	4064	558.8	254	152.4	0
13	1	14	Stress_Test	Stress	6	NA	17.33	NA	4.39	NA	64.52	104	32.5	1.5	0.1	244	154	6.4	3.5	2.9	312	17	41	5	125	393	8.3	5.6	86	155	4	117	29	3.83	15.7	45.8	119.7	41	34.2	100	19.4	11.8	8310	6648	747.9	747.9	83.1	0
13	1	14	Recovery	Recovery	6	570.99	6.53	222.82	1.18	88.23	207.29	113	32.7	1.3	0.1	223	201	6.2	3.4	2.8	316	14	39	5	128	361	8.2	5.8	87	153	3.9	117	31	3.66	15	42.6	116.5	40.9	35.1	109	17.5	11.8	6310	4543.2	1388.2	126.2	0	0
13	1	14	Recovery	Recovery	6	NA	8.47	NA	1.78	NA	25.6	113	34.1	1.3	0.1	234	254	6.3	3.6	2.7	319	16	40	5	128	337	8.4	6.8	84	154	3.8	116	34	3.78	15.4	44.8	118.6	40.7	34.4	107	18.4	11.7	7310	6140.4	950.3	73.1	73.1	0
13	1	14	Post_Test	baseline	6		8.05	34.53	2.07	11.61	13.63	119	29.1	1.4	0.1	236	156	6.1	3.4	2.7	304	16	39	6	126	374	8.5	5.8	85	155	3.8	116	35	3.83	15.6	44.9	117.4	40.9	34.8	102	17.9	11.6	6850	5411.5	616.5	548	205.5	0
13	1	14	Post_Test	baseline	6	154.02	5.62	NA	0.34	NA	8.1	120	35.6	1.3	0.1	227	278	6	3.4	2.6	306	14	37	4	122	361	8.1	5.7	98	153	3.9	115	32	3.68	15.3	44.2	120.2	41.7	34.7	108	18.4	11.8	5920	4499.2	888	236.8	118.4	0
13	1	14	PreTest	baseline	6	NA	11.17	NA	2.97	NA	27.84	120	30.9	1.5	0.1	227	151	5.9	3.4	2.5	290	15	39	4	118	390	8.2	5.5	80	155	4.1	119	30	3.69	15.1	43.2	117.1	40.9	34.9	108	18.7	11.6	7140	5355	1356.6	357	0	0
13	1	14	Recovery	Recovery	6	NA	10.93	NA	3.37	NA	245.85	122	30.6	1.3	0.1	229	195	6.1	3.4	2.7	298	15	40	4	128	362	8.2	5.6	85	153	3.9	118	29	3.67	15.1	43.6	118.8	41.2	34.7	97	18.1	11.9	6270	5266.8	689.7	250.8	0	0
14	1	9	Post_Test	baseline	3	212.67	18.4	75.57	4.02	1.87	3.95	101	38	1.3	0.1	156	115	7.1	3	4.1	355	11	32	5	108	293	8.2	6.1	82	148	4	127	32	3.32	13.4	38.8	117	40.3	34.6	179	18.8	13	4200	2982	630	420	168	0
14	1	9	Recovery	Recovery	3	77.38	13.81	11.79	2.13	6.74	98.51	105	39	1.2	0.1	164	186	7.4	3.2	4.2	366	11	34	5	109	306	8.2	6.6	89	147	3.9	122	31	3.43	13.7	40.1	117	39.9	34.1	207	15.1	12	5670	4139.1	1020.6	340.2	170.1	0
14	1	9	Recovery	Recovery	3	68.03	11.72	24.01	2.24	7.23	90.85	108	40	1.2	0.1	160	170	7.2	3.1	4.1	361	11	36	4	109	306	8.3	6.6	88	147	3.9	123	30	3.45	13.6	40.3	117	39.2	33.6	187	14.1	13.5	5850	4036.5	1462.5	292.5	58.5	0
14	1	9	PreTest	baseline	3	145.71	17.67	33.62	4.49	9.74	30.58	115	37	1.3	0.1	160	132	7.3	3	4.3	341	10	35	5	103	311	8.2	6.1	76	148	3.9	125	31	3.44	13.4	40	116	39	33.7	190	17.8	12.1	5470	4047.8	929.9	382.9	109.4	0
14	1	9	Stress_Test	Stress	3	161.92	60.68	51.31	11.19	21.32	61.86	134	36	1.3	0.1	160	127	7.4	3.2	4.2	356	11	33	5	114	303	8.1	6.2	78	146	3.7	123	32	3.47	13.8	40.6	117	39.8	34	197	15.2	14.6	5560	4392.4	611.6	278	278	0
15	1	16	PreTest	baseline	3	191.19	26.2	41.54	5.6	26.29	35.51	116	38	1.8	0.09	219	159	7	3.5	3.3	318	12	34	5	79	322	8.4	5.8	98	152	4.1	120	30	4.04	15.5	44.8	111	38.2	34.5	114	NA	13.7	5600	4200	1008	280	112	0
15	1	16	Recovery	Recovery	3	NA	17.88	NA	2.59	NA	27.93	117	42	1.7	0.1	224	197	7.3	3.7	3.6	322	11	37	4	83	330	8.6	6.2	101	153	4.1	119	30	4.13	15.5	45.3	110	37.6	34.3	121	17.2	13.8	4380	3635.4	525.6	131.4	0	0
15	1	16	Recovery	Recovery	3	44.71	15.12	73.73	2.25	10.45	1.26	122	44	1.6	0.11	221	240	7.5	3.7	3.8	323	12	37	6	81	330	8.5	5.9	121	152	4	116	32	3.92	15.2	43.3	111	38.8	35.1	116	16.4	12.9	4430	3499.7	664.5	132.9	132.9	0
15	1	16	Post_Test	baseline	3	200.97	14.85	70.71	4.06	16.7	24.67	123	39	1.9	0.13	226	206	7	3.6	3.4	318	10	35	6	86	312	8.6	6	66	152	4.2	119	28	3.97	15.1	43.9	111	38.1	34.4	115	12.3	1.4	4800	3312	1104	288	48	0
15	1	16	Stress_Test	Stress	3	500.48	104.12	262.57	20.69	97.35	29.04	154	37	1.8	0.11	227	148	7.8	3.6	4.2	323	10	36	5	81	326	8.5	5.9	112	151	4	120	26	4.23	16.1	46.4	109	38	34.7	123		13.2	6150	4797	984	246	61.5	0

## Sheet: Variable Description
Variable	Variable Description
id	Animal Id
gender	gender of each study animal
age	animal age at start of study
stage	PreTest: Samples collected immediately prior to stress test; Stress-Test: samples collected immediately after stressor
baseline	Baseline: samples collected immediately prior to stress test and 24 to 48 hrs after stressor; Stress: samples immediately after being lifted; Recovery: samples collected between 1 and 6 hr post stress.
month	Month of sample collection: Jan = 1, Feb = 2, etc…
Hormones
F_feces	fecal cortisol ng/g of feces
F_serum	serum cortisol ng/ml
B_feces	fecal corticosterone ng/g feces
b_serum	serum corticosterone ng/ml
ald_feces	fecal aldosterone ng/g feces
ald_serum	serum aldosterone ng/ml
Serum Chemistries
glucose	mg/dl
bun	blood urea nitrogen mg/dl
creatinine	crearinine mg/dl
totalbilirubin	total bilirubin mg/dl
cholesterol	mg/dL
triglyceride	mg/dL
totalprotein	g/dL
albumin	g/dL
globulin	g/dL
alp	akaline phosphotase (IU/L)
alt	alanine aminotransferase (IU/L)
ast	aspartate aminotransferase (IU/L)
ggt	gamma-glutamyl transpeptidase (IU/L)
creatinekinase	IU/L
ld	lactase dehydrogenase (IU/L)
ca	calcium (mg/dL)
p	phosphorus (mEq/dL)
fe	Iron (ug/dL)
na	sodium (mEq/L)
k	potassium (mEq/L)
cl	chloride (mg/dL)
co2	carbon dioxide (mEq/L)
rbcs	red blood cell count (x 1,000,000/uL)
hg	hemoglobin concentration (g/dL)
hct	hematocrit (%)
mcv	mean corpuscular volume (fl)
mch	mean corpuscular hemoglobin (pg)
mchc	mean corpuscular hemoglobin concentration (g/dL)
platelet	x 1000/ul
mpv	mean platelet volume (fl)
rdw	red blood cell distribution (%)
twbc	total white blood cell count (x1000/ul)
tNeut	total segmented neutrophil count (x1000/ul)
tLymph	total lymphocyte count (x1000/ul)
tMonos	total moncyte count (x1000/ul)
tEosins	total eosinoophil count (x1000/ul)
tBaso	total basophil count (x1000/ul)
